# Supplementary material for: Solid-State Construction of CuOx/Cu1.5Mn1.5O4 Nanocomposite with Abundant Surface CuOx Species and Oxygen Vacancies to Promote CO Oxidation Activity
Source: MDPI journal article supplement (doi:10.3390/ijms23126856), 2022-06-20
Supplement: s1 [file s1]

## Supporting information

### **Solid-State Construction of CuO<sub>x</sub>/Cu<sub>1.5</sub>Mn<sub>1.5</sub>O<sub>4</sub> Nanocomposite with Abundant Surface CuO<sub>x</sub> Species and Oxygen Vacancies to Promote CO Oxidation Activity**

Baolin Liu<sup>2,†</sup>, Hao Wu<sup>3,†</sup>, Shihao Li<sup>3</sup>, Mengjiao Xu<sup>2</sup>, Yali Cao<sup>2,\*</sup>, Yizhao Li<sup>1,3,\*</sup>

<sup>1</sup>*Yangtze Delta Region Institute (Huzhou), University of Electronic Science and Technology of China, Huzhou 313001, China.*

<sup>2</sup>*State Key Laboratory of Chemistry and Utilization of Carbon Based Energy Resources; College of Chemistry, Xinjiang University, Urumqi, 830017, Xinjiang, PR China;*

<sup>3</sup>*College of Chemical Engineering, Xinjiang University, Urumqi 830046, China.*

<sup>†</sup>*These authors contributed equally to this work.*

*\*Corresponding author. Tel: +86-572-2370780; Fax: +86-572-2370780;*

*E-mails: liyizhao0809@126.com (Y. Li); caoyali523@163.com (Y. Cao).*

## 1. The characterization of catalyst

In order to acquire the crystal structure of samples, X-ray powder diffraction (XRD) was obtained by Bruker D8 employing Cu-K $\alpha$  radiation (1.54056 Å) with an operating voltage of 40 kV and a beam current of 40 mA. The morphologies of samples were obtained on a Hitachi S-4800 scanning electron microscope with an accelerating voltage of 15 kV, and high-resolution transmission electron microscopes (HRTEM) with an accelerating voltage of 200 kV (JEOL JEM-2010F electron microscope). The element component of catalysts was measured by the energy disperse X-ray spectrum (EDS, EDAXTLS). The surface components and valence states of samples were characterized by X-ray photoelectron spectra (XPS) (Thermo Fisher Scientific ESCALAB250Xi) employing Al K $\alpha$  (1486.6 eV).

H<sub>2</sub> temperature-programmed reduction (H<sub>2</sub>-TPR) was implemented on Thermo TPDRO 1100 series to investigate the reducibility of catalysts. Typically, 50 mg of samples were pretreated firstly in the N<sub>2</sub> stream at 120°C for 60 min in a quartz reactor with a flow rate of 30 mL/min, and then they were cooled to room temperature. The gas feed was switched to 5% of the H<sub>2</sub>-N<sub>2</sub> gas mixture. The amount of H<sub>2</sub> consumption was monitored by a thermal conductivity detector (TCD). The TPR profile was recorded with temperature programming at a rate of 10°C min<sup>-1</sup> from 50 to 500°C.

For O<sub>2</sub> temperature-programmed desorption (O<sub>2</sub>-TPD), about 100 mg of catalyst was pretreated in a He stream at 120°C for 60 min with a flow rate of 30 mL/min. The temperature was reduced to room temperature and subsequently saturated with 10% O<sub>2</sub> (balanced with He) for 60 min, then purged by a pure He stream for 60 min. Finally, the temperature was heated to 600°C at a rate of 10 °C/min.

## 2. The test of catalytic performance

The catalytic performance of catalysts was evaluated by CO oxidation. In a typically process, 100 mg of catalyst without any pretreatment was loaded in a fixed-bed quartz reactor (30 cm in length, 8 mm in i.d.) at atmospheric pressure. The mixed feed gas contained with 1 vol% CO and 20 vol% O<sub>2</sub> in N<sub>2</sub> balanced with a flow rate of 50 ml min<sup>-1</sup> (space velocity = 30000 ml•gcat<sup>-1</sup>•h<sup>-1</sup>) was applied to the reactor. The variety of gas concentration was monitored with an online gas chromatography

system (Agilent 7890B) equipped with a TCD. The CO conversion rate was calculated based on the following formula.

$$\text{CO conversion (\%)} = \frac{[\text{CO}]_{\text{in}} - [\text{CO}]_{\text{out}}}{[\text{CO}]_{\text{in}}} \times 100\%$$

### 3. DFT Calculations

Spin-polarized density functional theory (DFT) calculations were performed using the Quantum ESPRESSO, coupled with the generalized gradient approximation (GGA) of the Perdew–Burke–Ernzerhof (PBE) for the exchange correlation functional. The plane-wave cutoff energy is 400 eV. The (111) plane of CuO and (311) plane of Cu<sub>1.5</sub>Mn<sub>1.5</sub>O<sub>4</sub> were chosen for the theoretical calculations according to the HRTEM and XRD results. The 3D periodic slabs of CuO, Cu<sub>1.5</sub>Mn<sub>1.5</sub>O<sub>4</sub>, and CuO<sub>x</sub>/Cu<sub>1.5</sub>Mn<sub>1.5</sub>O<sub>4</sub> surfaces were chosen to interact with CO and O<sub>2</sub> molecules. The three slab models including four atomic layers were constructed with a vacuum space of 20 Å and 4 × 4 × 1 Monkhorst–Pack grid for surface calculations. During geometry optimization, the atoms in the bottom two atomic layers were fixed at their bulk-truncated positions and the top two atomic layers along with the adsorbates were fully relaxed. The adsorption configurations of CO and O<sub>2</sub> molecules on model atomic configurations were explored. The adsorption energy ( $E_{\text{ads}}$ ) was defined by  $E_{\text{ads}} = - (E_{\text{CO-slab}} - E_{\text{slab}} - E_{\text{CO}})$ , where,  $E_{\text{CO-slab}}$ ,  $E_{\text{slab}}$ , and  $E_{\text{CO}}$  are total energy for the CO-slab complex, the isolated slab, and the isolated CO molecule, respectively.

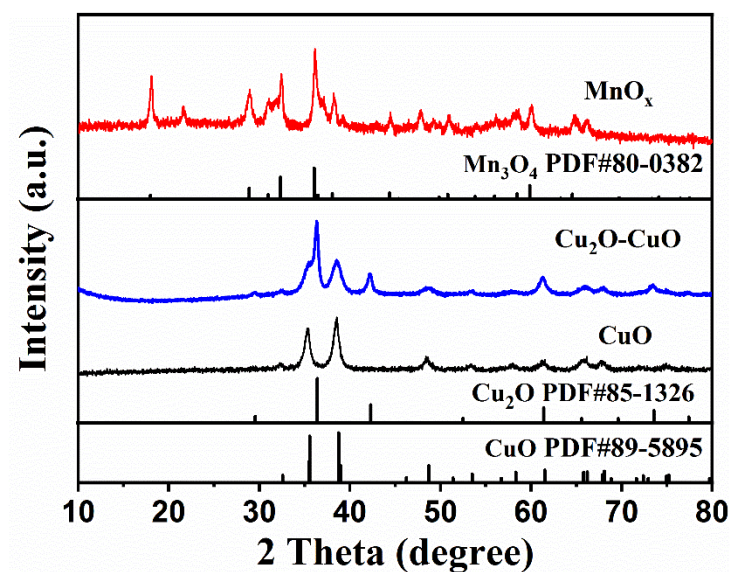

**Figure S1.** XRD patterns of as-synthesized  $\text{MnO}_x$ ,  $\text{Cu}_2\text{O-CuO}$ , and  $\text{CuO}$ .

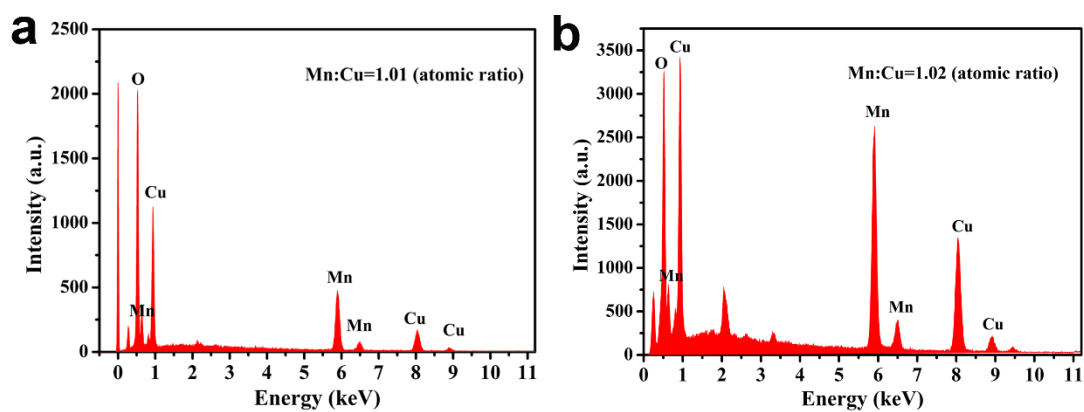

**Figure S2.** EDS spectra of the  $\text{CuO}_x\text{-MnO}_x$  nanocomposites: (a)  $\text{Cu}_{1.5}\text{Mn}_{1.5}\text{O}_4$  and (b)  $\text{CuO}_x/\text{Cu}_{1.5}\text{Mn}_{1.5}\text{O}_4$ .

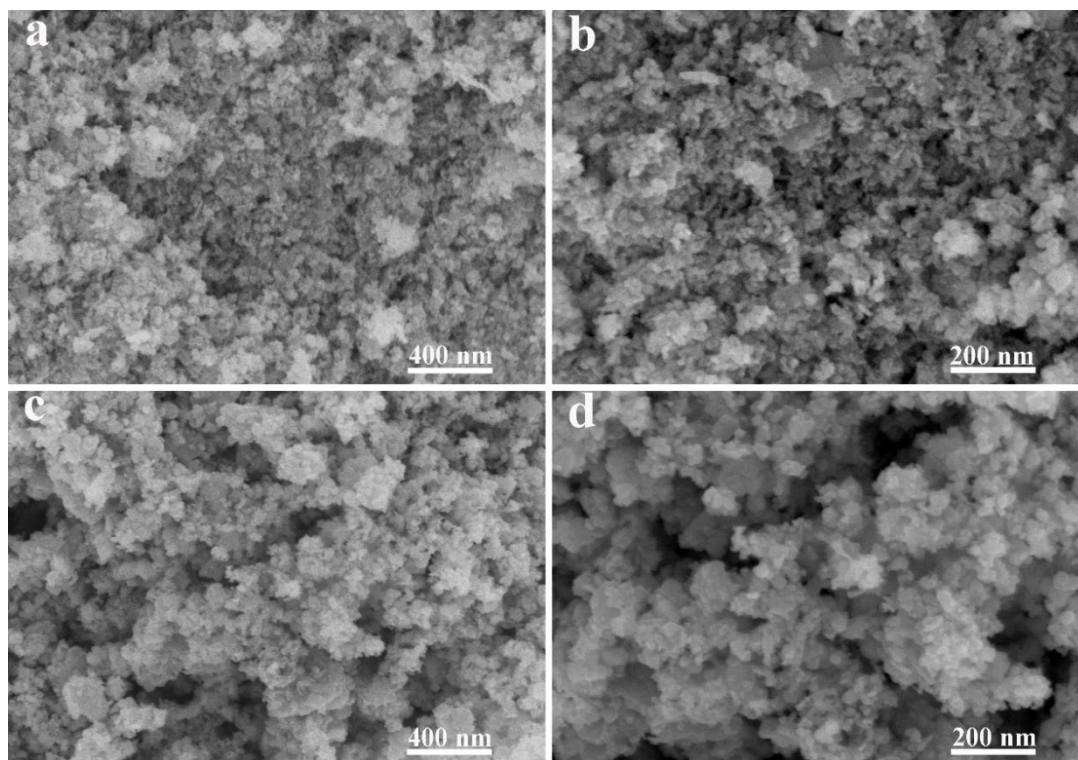

**Figure S3.** FESEM images for  $\text{CuO}_x\text{-MnO}_x$  nanoparticles with different Cu/Mn mole ratio: (a-b) Cu/Mn = 1:2 and (c-d) Cu/Mn = 2:1.

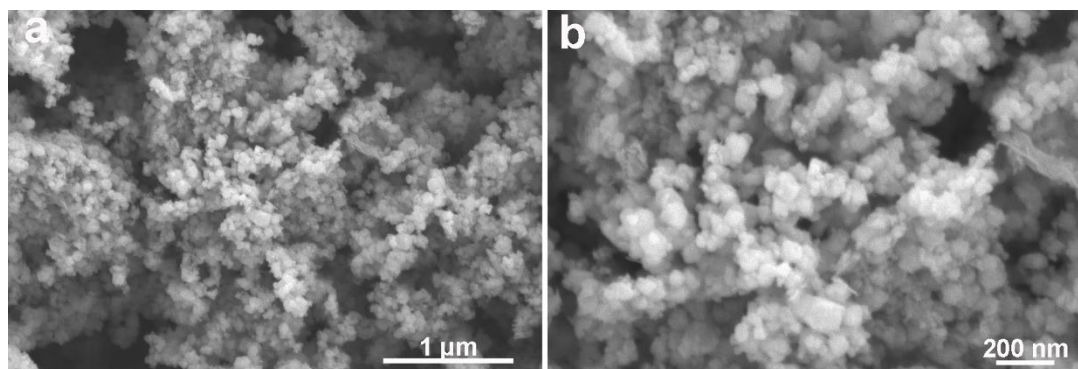

**Figure S4.** FESEM images for  $\text{MnO}_x$  nanoparticles.

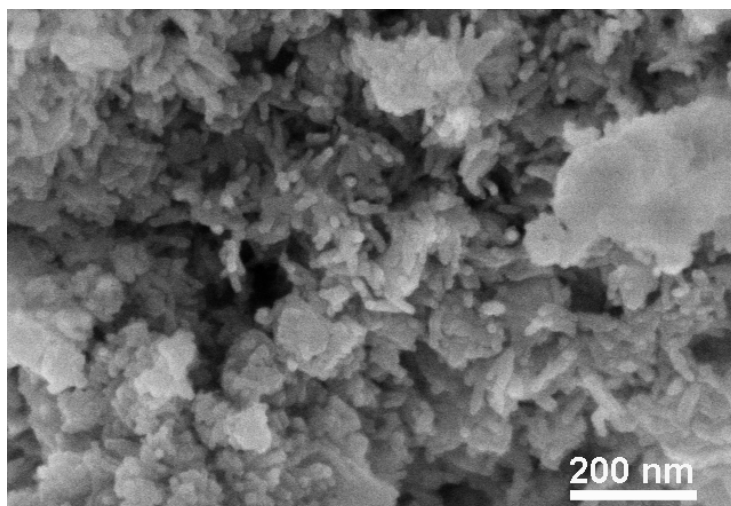

**Figure S5.** FESEM image for Cu<sub>2</sub>O-CuO nanocomposite.

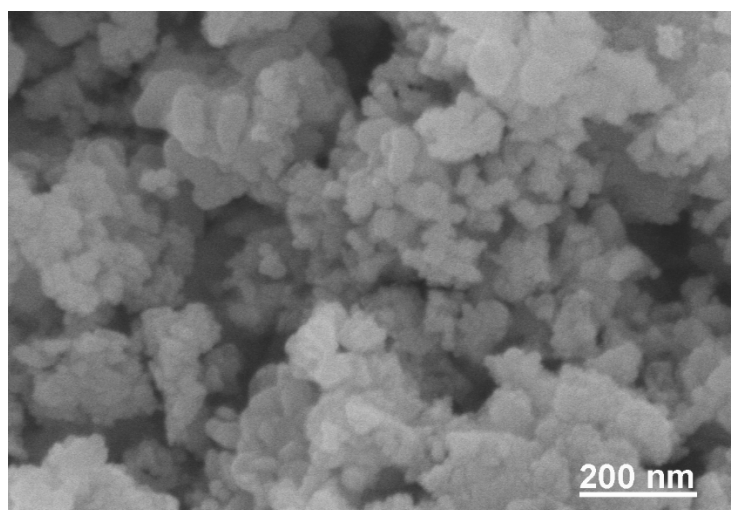

**Figure S6.** FESEM image for CuO nanoparticles.

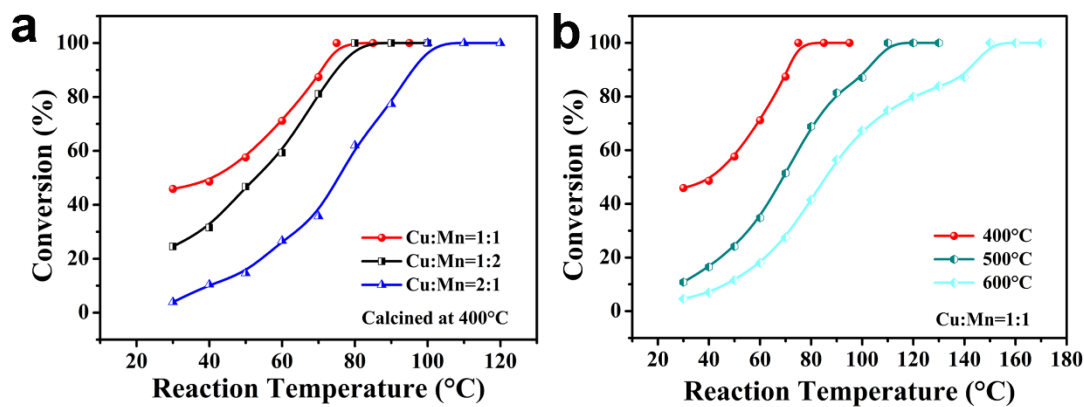

**Figure S7.** The CO conversion performances over a series of CuO<sub>x</sub>-MnO<sub>x</sub> nanocomposites with different (a) Cu/Mn mole ratio and (b) calcination temperature.

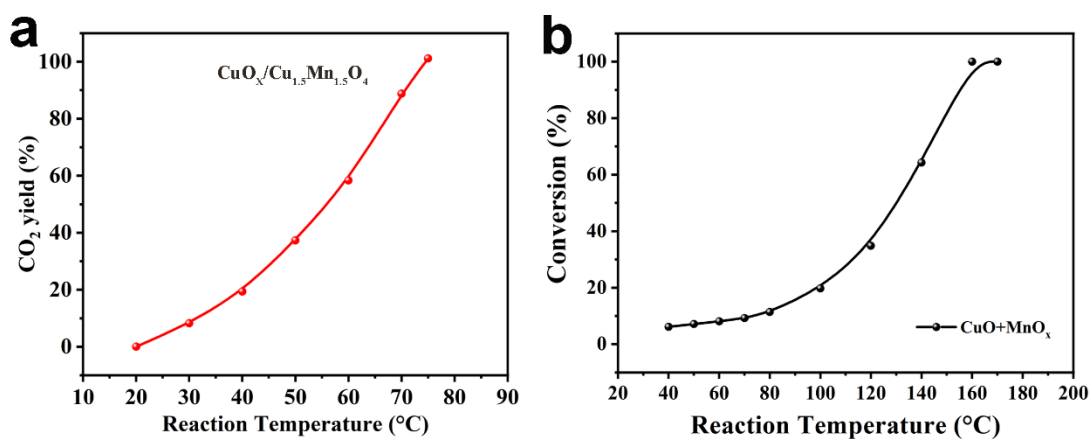

**Figure S8.** (a) CO<sub>2</sub> yield in the CO oxidation of CuO<sub>x</sub>/Cu<sub>1.5</sub>Mn<sub>1.5</sub>O<sub>4</sub>; (b) the CO conversion performances of physical mixing of CuO<sub>x</sub>+MnO<sub>x</sub> catalyst for CO oxidation.

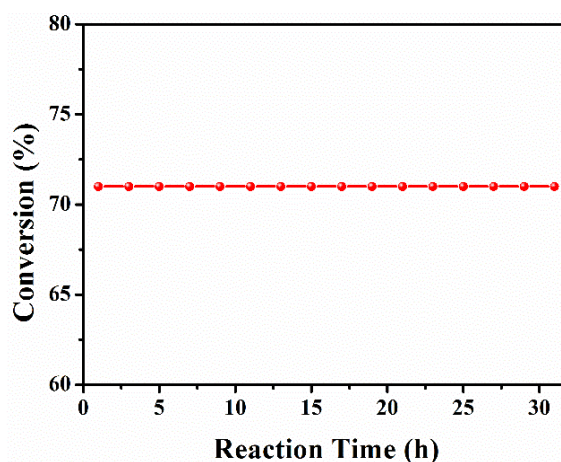

**Figure S9.** The stability test of CuO<sub>x</sub>/Cu<sub>1.5</sub>Mn<sub>1.5</sub>O<sub>4</sub> sample for CO oxidation.



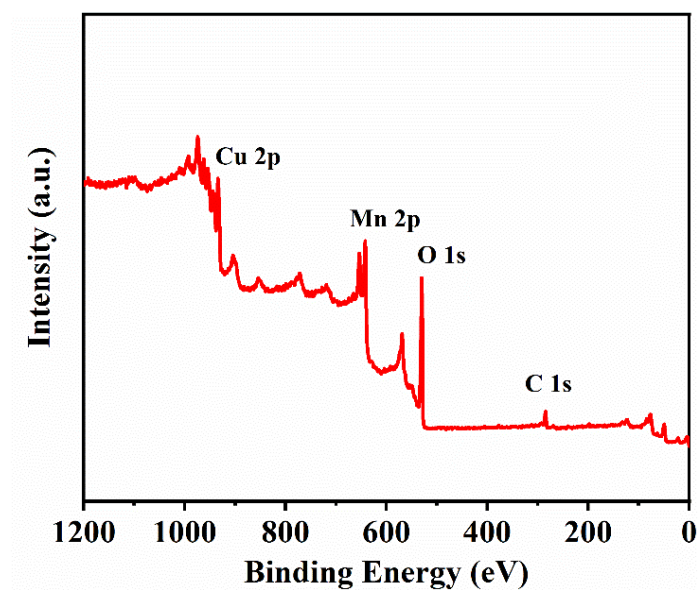

**Figure S10.** The survey of XPS spectrum of  $\text{CuO}_x/\text{Cu}_{1.5}\text{Mn}_{1.5}\text{O}_4$ .

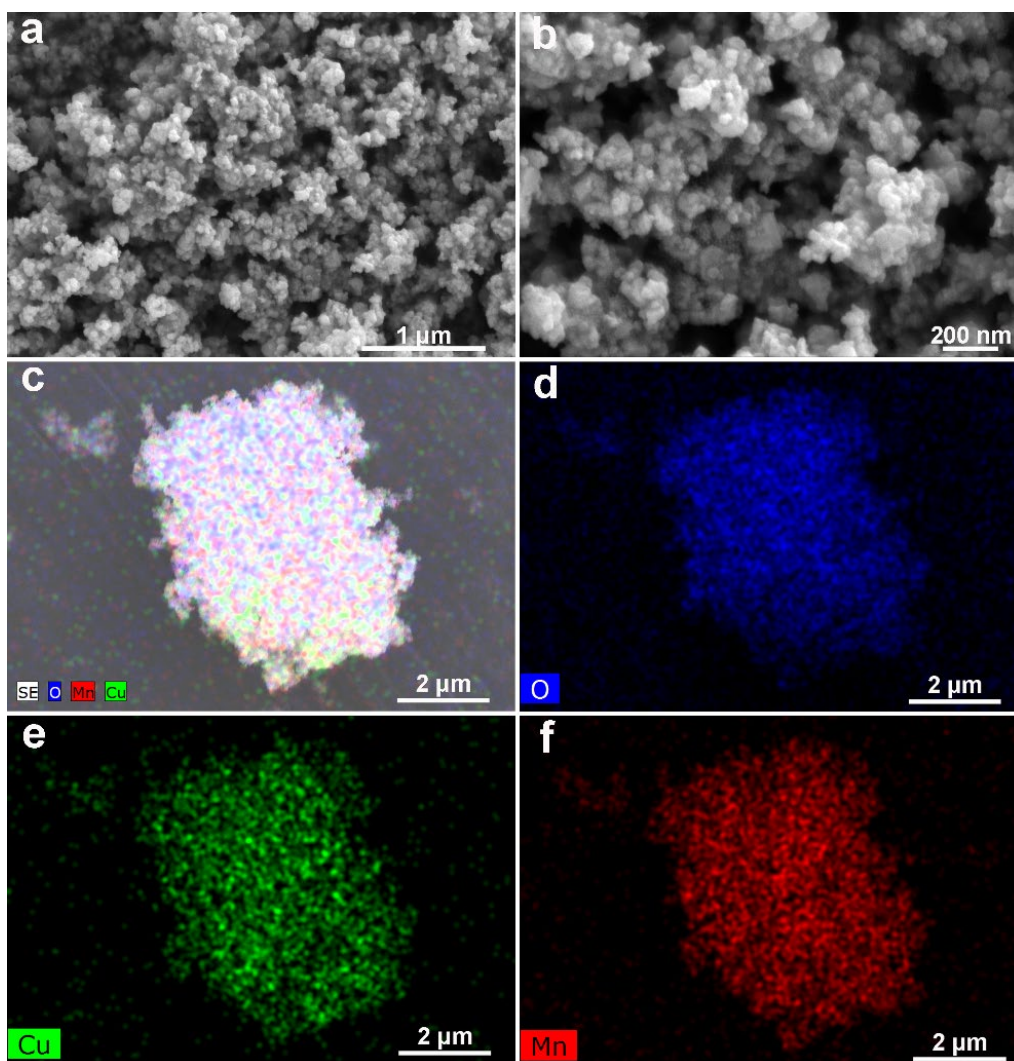

**Figure S11.** (a-b) FESEM images, and (c-f) the corresponding element mapping patterns of  $\text{Cu}_{1.5}\text{Mn}_{1.5}\text{O}_4$  sample.



**Table S1.** Catalytic activity of CO oxidation with CuO<sub>x</sub>-MnO<sub>x</sub> nanocomposites obtained from different preparation method reported in previous literature.

| Sample                                                                             | Method                      | Amount of catalyst (mg) | Feed gas composition                        | Flow rate (mL·min <sup>-1</sup> ) | T <sub>50</sub> (°C) | T <sub>100</sub> (°C)  | Ref.      |
|------------------------------------------------------------------------------------|-----------------------------|-------------------------|---------------------------------------------|-----------------------------------|----------------------|------------------------|-----------|
| CuO/Mn <sub>2</sub> O <sub>3</sub>                                                 | Sol-gel method              | 75                      | CO/O <sub>2</sub> /Ar=8/20/72               | 25                                | 81                   | 98                     | [1]       |
| Cu-Mn/CeO <sub>2</sub>                                                             | Wet co-impregnation         | 9300                    | CO/Ar=0.4/99.6                              | 300                               | 95.7                 | 145.6                  | [2]       |
| Mn <sub>3</sub> O <sub>4</sub> /CeO <sub>2</sub>                                   | Hydrothermal method         | 100                     | CO/O <sub>2</sub> /He = 1/4/95              | -                                 | 103                  | 194 (T <sub>90</sub> ) | [3]       |
| Cu-Mn-O catalysts                                                                  | Spray pyrolysis             | 100                     | CO/O <sub>2</sub> /He = 1/20/79             | 10                                | 32                   | 63                     | [4]       |
| Mn-Cu-Co oxide                                                                     | Chemical solution method    | 100                     | CO/O <sub>2</sub> /Ar=1/20/79               | 30                                | 34                   | 75 (T <sub>90</sub> )  | [5]       |
| CuO/MnO <sub>2</sub>                                                               | Solution method             | 50                      | CO/Air=1/99                                 | 20                                | -                    | 110                    | [6]       |
| CuO <sub>x</sub> /Cu <sub>1.5</sub> Mn <sub>1.5</sub> O <sub>4</sub> nanocomposite | Solid-state chemical method | 100                     | CO/O <sub>2</sub> /N <sub>2</sub> = 1/20/79 | 50                                | 41                   | 75                     | This work |

**Table S2.** XPS results of different samples.

| Sample                                                               | Cu <sup>+</sup><br>(%) <sup>a</sup> | Cu <sup>2+</sup><br>(%) <sup>b</sup> | Mn <sup>3+</sup><br>(%) <sup>c</sup> | Mn <sup>4+</sup><br>(%) <sup>d</sup> | O <sub>α</sub> (%) <sup>e</sup> | O <sub>β</sub> (%) <sup>e</sup> | O <sub>γ</sub> (%) <sup>e</sup> |
|----------------------------------------------------------------------|-------------------------------------|--------------------------------------|--------------------------------------|--------------------------------------|---------------------------------|---------------------------------|---------------------------------|
| Cu <sub>1.5</sub> Mn <sub>1.5</sub> O <sub>4</sub>                   | 39.43                               | 60.57                                | 77.00                                | 23.00                                | 76.96                           | 17.42                           | 5.62                            |
| CuO <sub>x</sub> /Cu <sub>1.5</sub> Mn <sub>1.5</sub> O <sub>4</sub> | 24.81                               | 75.19                                | 74.79                                | 24.21                                | 74.89                           | 19.41                           | 5.69                            |

<sup>a</sup> Cu<sup>+</sup> proportion were estimated by  $(\text{Cu}^+/\text{Cu}^{2+} + \text{Cu}^+) \times 100\%$  from XPS;

<sup>b</sup> Cu<sup>2+</sup> proportion were estimated by  $(\text{Cu}^{2+}/\text{Cu}^{2+} + \text{Cu}^+) \times 100\%$  from XPS;

<sup>c</sup> Mn<sup>3+</sup> proportion were estimated by  $(\text{Mn}^{3+}/\text{Mn}^{4+} + \text{Mn}^{3+}) \times 100\%$  from XPS;

<sup>d</sup> Mn<sup>4+</sup> proportion were estimated by  $(\text{Mn}^{4+}/\text{Mn}^{4+} + \text{Mn}^{3+}) \times 100\%$  from XPS;

<sup>e</sup> O<sub>α</sub>, lattice oxygen; O<sub>β</sub>, surface adsorbed oxygen; O<sub>γ</sub>, chemisorbed water and/or carbonates.

**Table S3.** The peak areas of different samples integrated from corresponding H<sub>2</sub>-TPR profiles.

| Sample                                                               | Peak α | Peak β | Peak γ |
|----------------------------------------------------------------------|--------|--------|--------|
| Cu <sub>1.5</sub> Mn <sub>1.5</sub> O <sub>4</sub>                   | 0.54   | 4.43   | 17.61  |
| CuO <sub>x</sub> /Cu <sub>1.5</sub> Mn <sub>1.5</sub> O <sub>4</sub> | 1.24   | 3.39   | 17.97  |

## References

1. Rastegarpanah, A.; Rezaei, M.; Meshkani, F.; Dai, H. 3D ordered honeycomb-shaped  $\text{CuO} \cdot \text{Mn}_2\text{O}_3$ : Highly active catalysts for CO oxidation. *Mol. Catal.* **2020**, *485*, 1108201-1108206.
2. Lin, J.; Guo, Y.; Chen, X.; Li, C.; Lu, S.; Liew, K.M. CO Oxidation over Nanostructured Ceria Supported Bimetallic Cu-Mn Oxides Catalysts: Effect of Cu/Mn Ratio and Calcination Temperature. *Catal. Lett.* **2018**, *148* (1), 181-193.
3. Jampaiah, D.; Velisoju, V.K.; Devaiah, D.; Singh, M.; Mayes, E.L.H.; Coyle, V.E.; Reddy, B.M.; Bansal, V.; Bhargava, S.K. Flower-like  $\text{Mn}_3\text{O}_4/\text{CeO}_2$  microspheres as an efficient catalyst for diesel soot and CO oxidation: Synergistic effects for enhanced catalytic performance. *Appl. Surf. Sci.* **2019**, *473*, 209-221.
4. Zhou, Y.; Liu, X.; Wang, K.; Li, J.; Zhang, X.; Jin, X.; Tang, X.; Zhu, X.; Zhang, R.; Jiang, X.; Liu, B. Porous Cu-Mn-O catalysts fabricated by spray pyrolysis method for efficient CO oxidation. *Results in Physics* **2019**, *12*, 1893-1900.
5. Choi, K.-H.; Lee, D.-H.; Kim, H.-S.; Yoon, Y.-C.; Park, C.-S.; Kim, Y.H. Reaction Characteristics of Precious-Metal-Free Ternary Mn-Cu-M (M = Ce, Co, Cr, and Fe) Oxide Catalysts for Low-Temperature CO Oxidation. *Ind. Eng. Chem. Res.* **2016**, *55* (16), 4443-4450.
6. Qian, K.; Qian, Z.X.; Hua, Q.; Jiang, Z.Q.; Huang, W.X. Structure-activity relationship of  $\text{CuO}/\text{MnO}_2$  catalysts in CO oxidation. *Appl. Surf. Sci.* **2013**, *273*, 357-363.
